# Supplementary material
Source: PubMed Central journal article supplement (PMC4190031)

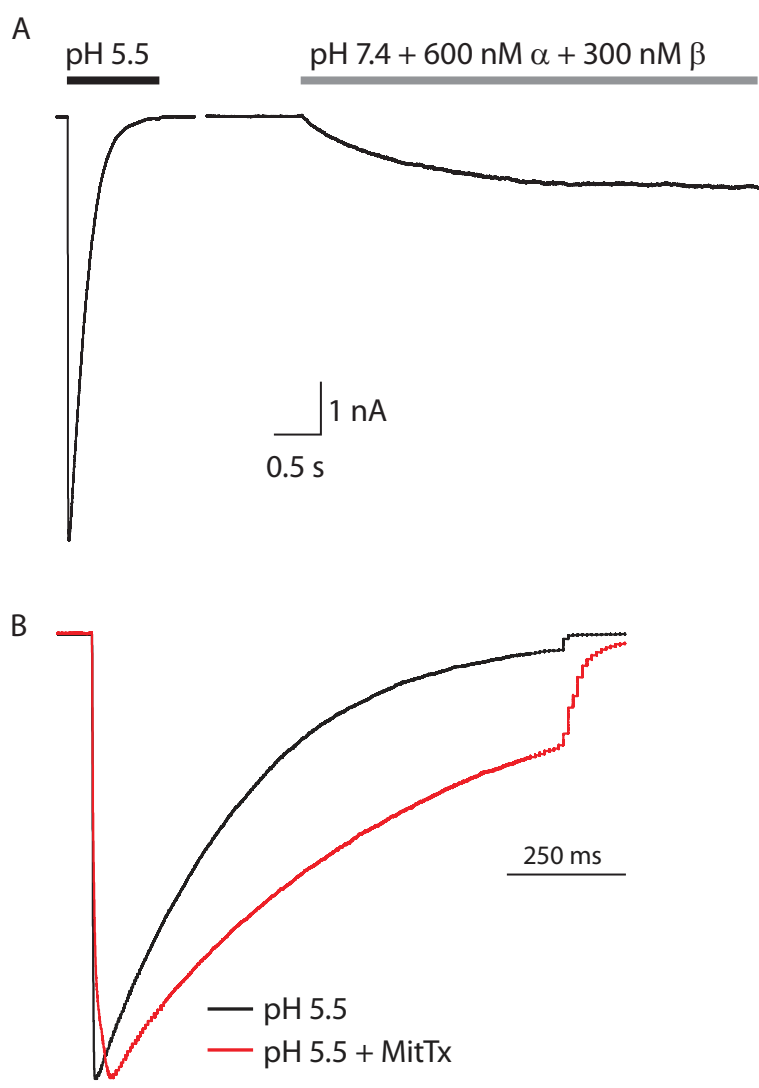

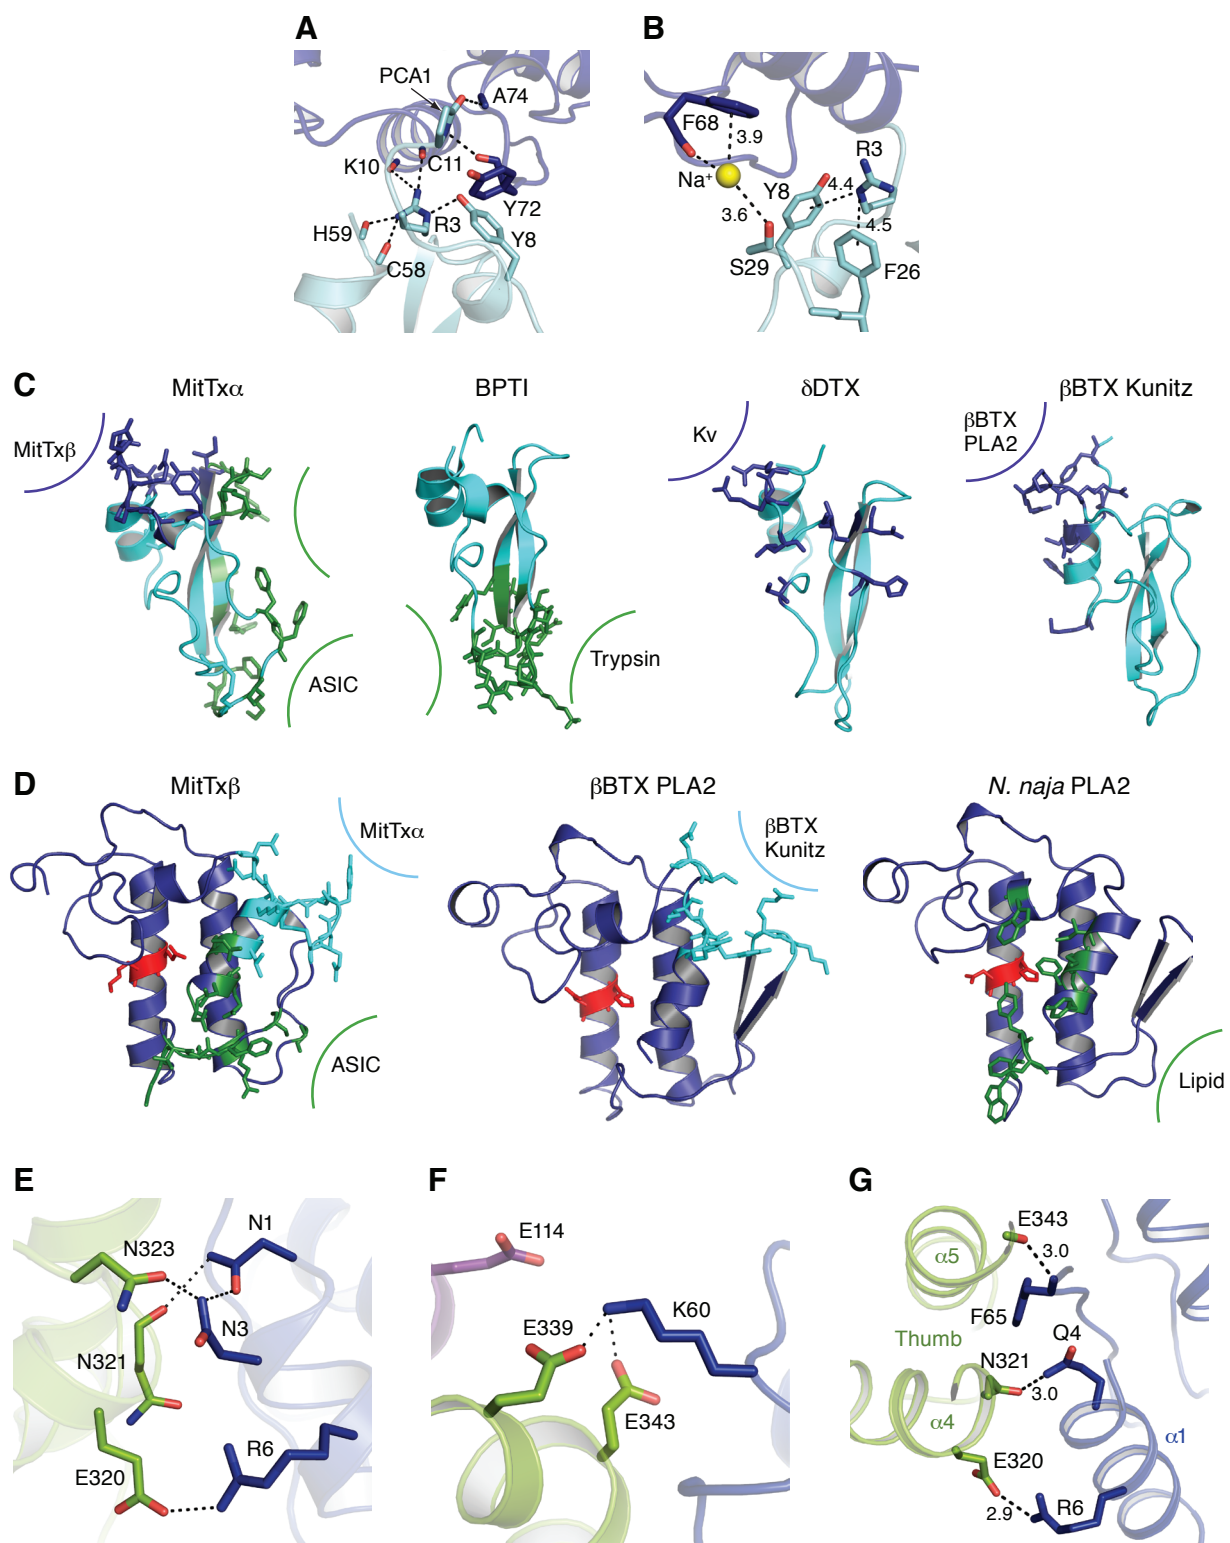

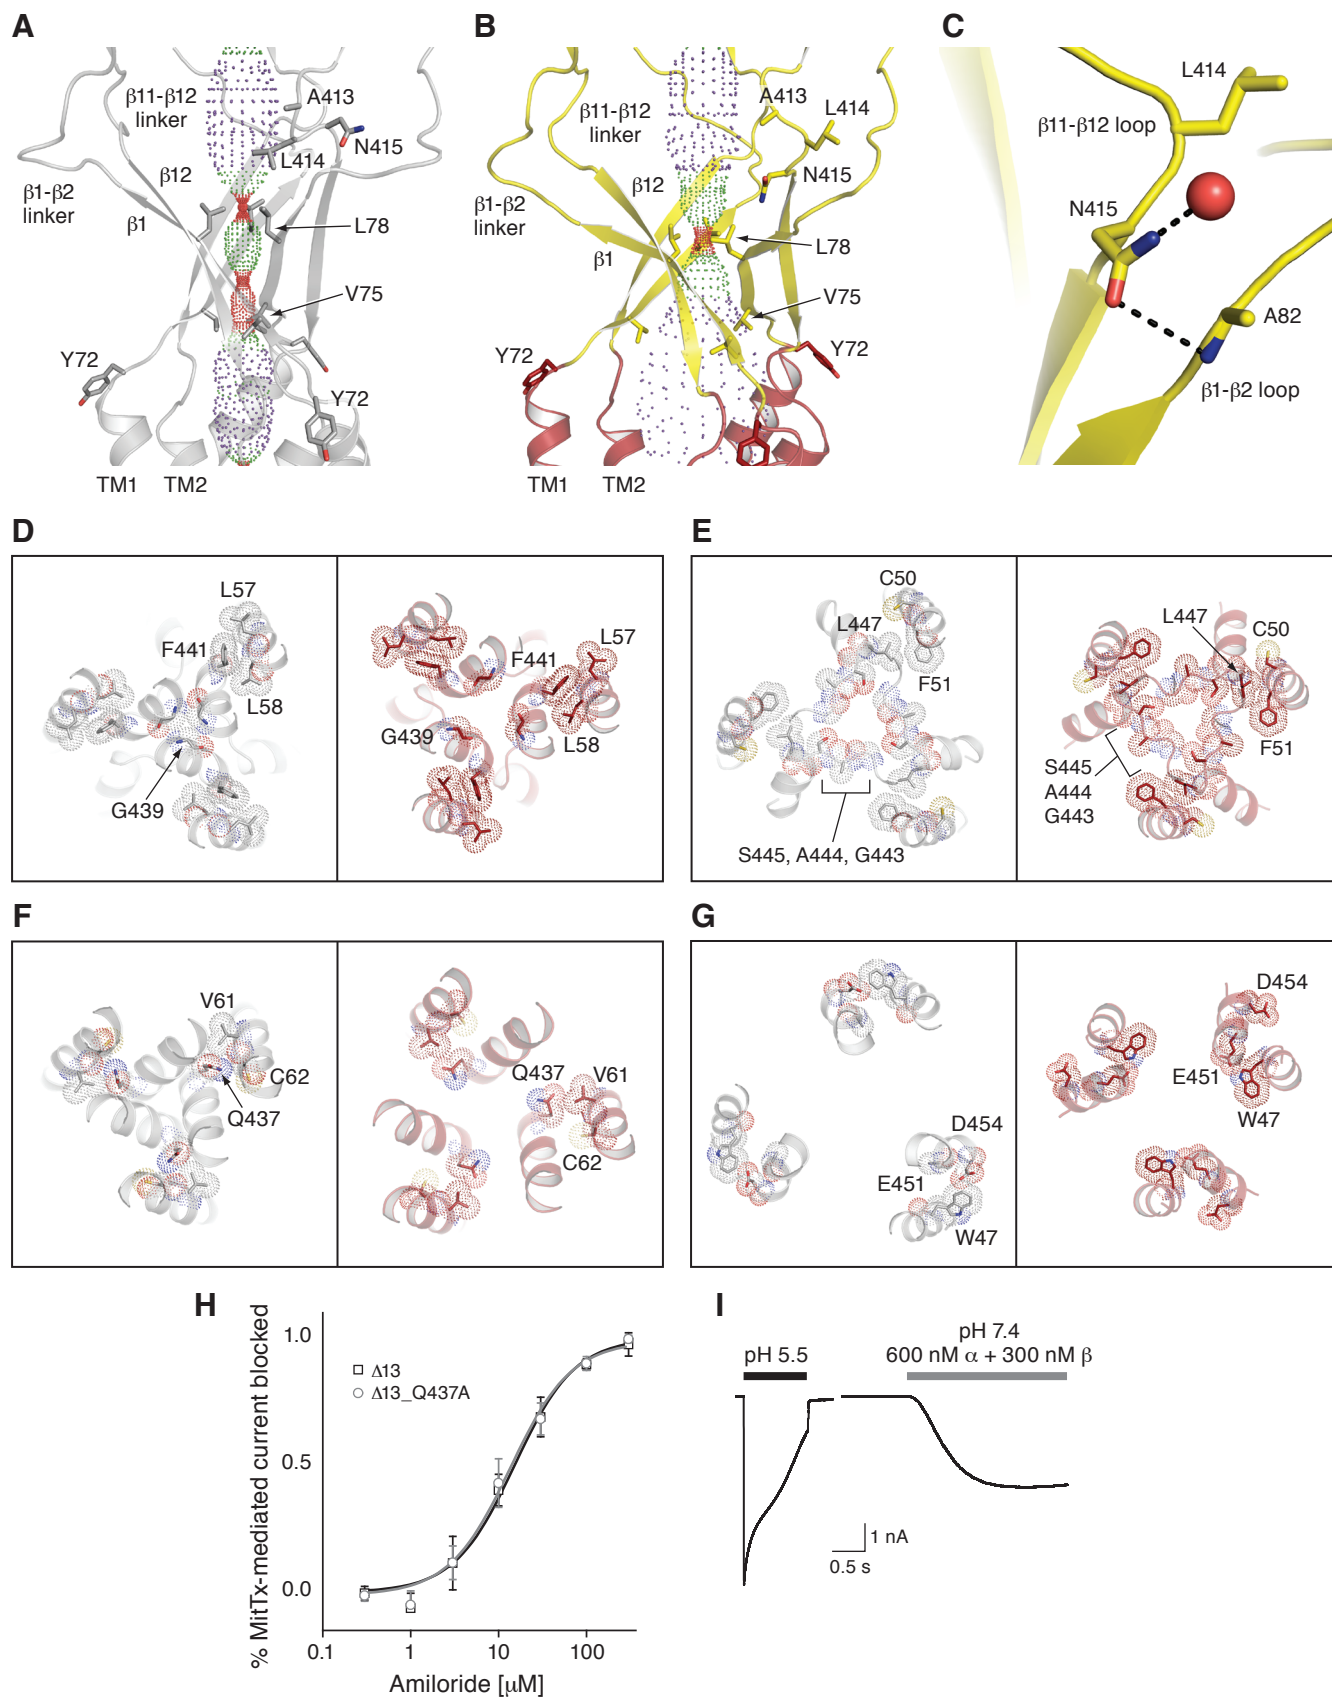

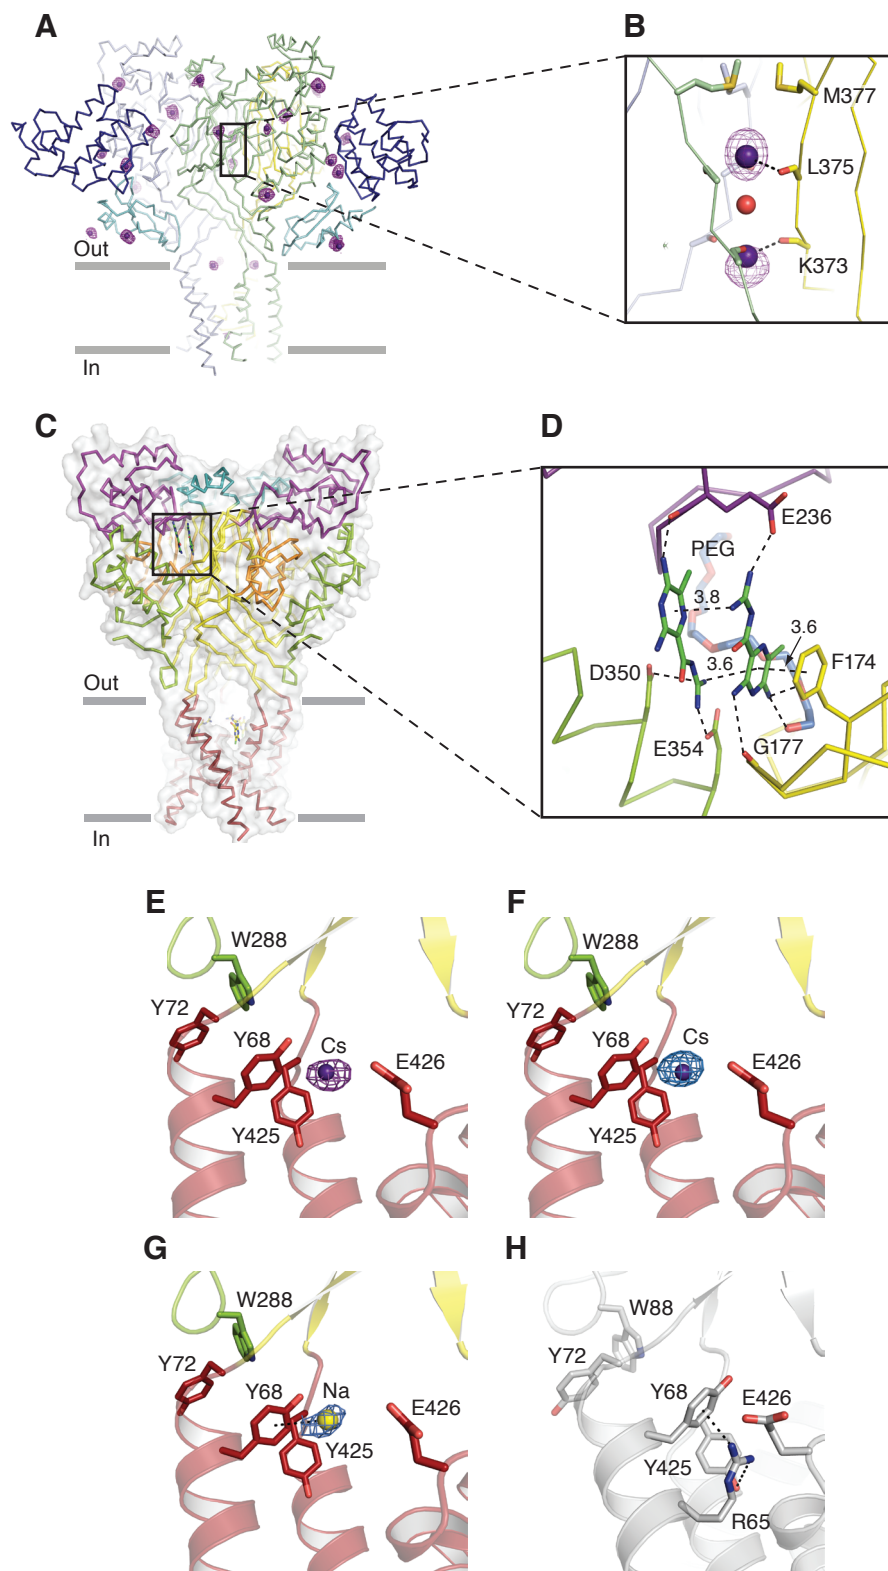

Supplement: NIHMS569691-supplement-02.pdf [file NIHMS569691-supplement-02.pdf]
